# Supplementary material for: Late Elongated Hypocotyl Positively Regulates Salt Stress Tolerance in Medicago truncatula
Source: MDPI journal article supplement (doi:10.3390/ijms24129948), 2023-06-09
Supplement: s1 [file s1]

**Supplementary Table S1.** List of primers used in this study.

|                             |                                                 |
|-----------------------------|-------------------------------------------------|
| <i>MtLHY</i> -CDS-F         | 5'-ATGGATGCAGCAGCATACTCCTCTG-3'                 |
| <i>MtLHY</i> -CDS-R         | 5'-AATAGAAGTCCCCCCTTCCAGG-3'                    |
| <i>MtLHY</i> -CDS-R1        | 5'-CTTGATTGCCGAAGATACAGA-3'                     |
| <i>MtLHY</i> -CDS-F2        | 5'-AAAAGCAGGCTCCGCGATGGATGCAGCAGCATACTCCTCTG-3' |
| <i>MtLHY</i> -CDS-R2        | 5'-AGCTGGGTCGGCGCGAATAGAAGTCCCCCCTTCCAGG-3'     |
| <i>MtLHY</i> -qRT-F         | 5'-CTGTGCACGTTGTTGATGGG-3'                      |
| <i>MtLHY</i> -qRT-R         | 5'-GCAGCTGGATTTGCGAAGAG-3'                      |
| <i>MtFLS</i> -qRT-F         | 5'-GCTGCAGGTGGAGATGAGTT-3'                      |
| <i>MtFLS</i> -qRT-R         | 5'-TGAAGGCCCTGCACTTCATT-3'                      |
| <i>MtFLS</i> -PROMOTER-F1   | 5'-TCTATCTCAACTACCCACCAA-3'                     |
| <i>MtFLS</i> -PROMOTER-R1   | 5'-TGTTACTTTGGTTTTTTTTCTTTCT-3'                 |
| <i>MtFLS</i> -PROMOTER-F2   | 5'-ATAAGCTTACCTCCAGATTGTAGGAACGGCTC-3'          |
| <i>MtFLS</i> -PROMOTER-R2   | 5'-ATAGAGCTCGTGAGTATGAGAGAGAAAGTTGTCA-3'        |
| <i>Medtr1g097910</i> -qRT-F | 5'-GTGCCCCGTGTGTTGGTTGTC-3'                     |
| <i>Medtr1g097910</i> -qRT-R | 5'-CTGTCCAACAAGGCTGTCCA-3'                      |
| <i>Medtr2g058470</i> -qRT-F | 5'-CCTGGTGCCGATTACCAACT-3'                      |
| <i>Medtr2g058470</i> -qRT-R | 5'-CCACCTGCAAAACACCCTTG-3'                      |
| <i>Medtr7g016820</i> -qRT-F | 5'-CACTGCTGTACATTTTCGTG-3'                      |
| <i>Medtr7g016820</i> -qRT-R | 5'-GGTATTGGGTCAGAGCCAAC-3'                      |
| <i>Medtr1g115840</i> -qRT-F | 5'-CACCAGGGACTGCTGCTTTC-3'                      |
| <i>Medtr1g115840</i> -qRT-R | 5'-GTCTCCAACACCGCCTCCGA-3'                      |
| <i>Medtr1g115870</i> -qRT-F | 5'-CCGTTGACGGGACACCAATA-3'                      |
| <i>Medtr1g115870</i> -qRT-R | 5'-AGGATAGAGGAGCCTGGTGG-3'                      |
| <i>Medtr3g058610</i> -qRT-F | 5'-AACAAGTGGGTGGCCTTCAA-3'                      |
| <i>Medtr3g058610</i> -qRT-R | 5'-CTGGAATTCACCACTGCCCT-3'                      |
| <i>Medtr4g109470</i> -qRT-F | 5'-ACTCCTCTATCCCTCCCACG-3'                      |
| <i>Medtr4g109470</i> -qRT-R | 5'-TTAGGGTCGCGTGATATGGC-3'                      |
| <i>Medtr4g088160</i> -qRT-F | 5'-CTACTGCAGGAATGGCCACA-3'                      |
| <i>Medtr4g088160</i> -qRT-R | 5'-CGACACCAGCTCTTGTGAGT-3'                      |
| <i>Medtr1g105020</i> -qRT-F | 5'-TGGTGGTGATACTTCAGGTGC-3'                     |
| <i>Medtr1g105020</i> -qRT-R | 5'-ACCGGCTTCGAACTCCAAAA-3'                      |
